# Supplementary material for: Supplemental Microalgal DHA and Astaxanthin Affect Astaxanthin Metabolism and Redox Status of Juvenile Rainbow Trout
Source: PubMed Central journal article supplement (PMC7823529; doi:10.3390/antiox10010016), 2020-12-27
Supplement: antioxidants-10-00016-s001.pdf [file antioxidants-10-00016-s001.pdf]

Table S1. Gene accession numbers and primer sequences for transcript targets

| Gene           | Forward Primer           | Reverse Primer           | Accession Number | Product length |
|----------------|--------------------------|--------------------------|------------------|----------------|
| <b>sod1</b>    | TGGTCCTGTGAAGCTGATTG     | TTGTCAGCTCCTGCAGTCAC     | AF469663.1       | 201            |
| <b>sod2</b>    | TCCCTGACCTGACCTACGAC     | GGCCTCCTCCATTAAACCTC     | CA352127.1       | 201            |
| <b>gpx1a</b>   | AATGTGGCGTCACTCTGAGG     | CAATTCTCCTGATGGCCAAA     | HE687021         | 131            |
| <b>gpx1b1</b>  | CGAGCTCCATGAACGGTACG     | TGCTTCCCGTTCACATCCAC     | CA357669.1       | 183            |
| <b>gpx1b2</b>  | TCGGACATCAGGAGAACTGC     | TCCTTCCCATTACATCCAC      | HE687023         | 121            |
| <b>cat</b>     | TGATGTCACACAGGTGCGTA     | GTGGGCTCAGTGTTGTTGAG     | BX087110.3       | 195            |
| <b>gr</b>      | CTAAGCGCAGCGTCATAGTG     | ACACCCCTGTCTGACGACAT     | CA368976.1       | 108            |
| <b>gst</b>     | TCGCTGACTGGACGAAAGGA     | CGAAGGTCCTCAACGCCATC     | BX302932.3       | 196            |
| <b>b-actin</b> | GCCGGCCGCGACCTCACAGACTAC | CGGCCGTGGTGGTGAAGCTGTAAC | AF157514         | 73             |
| <b>elf1a</b>   | TTAAGCAACCATGGGAAAGG     | TACCTGCCGGTCTCAAACCTT    | NM_001124339     | 264            |

Abbreviations: sod: superoxide dismutase; gpx: glutathione peroxidase; cat: catalase, gr: glutathione reductase; gst: glutathione S-transferase; b-actin: beta-actin; elf: elongation factor.

**Table S2.** Correlations between astaxanthin concentrations and MDA and GSH concentrations and antioxidant enzyme activities in the muscle and liver of rainbow trout

|          | Diets <sup>1</sup> |                  | MDA <sup>3</sup> | GSH       | GST       | GPX      | GR       | SOD      |           |
|----------|--------------------|------------------|------------------|-----------|-----------|----------|----------|----------|-----------|
| Muscle   | PM<br>SA           | AST <sup>2</sup> | R -0.29          | R 0.25    | R 0.042   | R -0.053 | R 0.46   | R 0.39   |           |
|          |                    |                  | P 0.45           | P 0.52    | P 0.92    | P 0.89   | P 0.22   | P 0.30   |           |
|          | PM<br>AA           | AST              | R 0.46           | R -0.55   | R 0.87    | R 0.51   | R 0.76   | R 0.74   |           |
|          |                    |                  | P 0.21           | P 0.13    | P 0.002** | P 0.17   | P 0.018* | P 0.023* |           |
|          | FM<br>SA           | AST              | R 0.28           | R 0.70    | R 0.35    | R -0.39  | R 0.45   | R 0.21   |           |
|          |                    |                  | P 0.46           | P 0.035*  | P 0.36    | P 0.30   | P 0.23   | P 0.59   |           |
|          | FM<br>AA           | AST              | R 0.096          | R 0.44    | R 0.64    | R 0.241  | R 0.059  | R -0.57  |           |
|          |                    |                  | P 0.81           | P 0.24    | P 0.066   | P 0.53   | P 0.88   | P 0.11   |           |
|          | Liver              | PM<br>SA         | AST              | R -0.83   | R -0.40   | R 0.39   | R 0.14   | R -0.11  | R 0.818   |
|          |                    |                  |                  | P 0.005** | P 0.29    | P 0.30   | P 0.73   | P 0.78   | P 0.007** |
| PM<br>AA |                    | AST              | R -0.40          | R 0.062   | R 0.72    | R 0.66   | R -0.20  | R 0.65   |           |
|          |                    |                  | P 0.29           | P 0.87    | P 0.030*  | P 0.055  | P 0.61   | P 0.057  |           |
| FM<br>SA |                    | AST              | R -0.11          | R -0.58   | R -0.24   | R 0.26   | R 0.30   | R 0.44   |           |
|          |                    |                  | P 0.78           | P 0.11    | P 0.54    | P 0.49   | P 0.43   | P 0.24   |           |
|          | AST                | R 0.12           | R 0.27           | R 0.031   | R 0.67    | R 0.37   | R 0.90   |          |           |

|  |    |  |        |        |        |          |        |           |
|--|----|--|--------|--------|--------|----------|--------|-----------|
|  | FM |  |        |        |        |          |        |           |
|  | AA |  | P 0.77 | P 0.48 | P 0.94 | P 0.048* | P 0.33 | P 0.001** |

<sup>1</sup>PM: plant protein meal based diets, FM: fishmeal based diets; SA: synthetic astaxanthin, AA: microalgal astaxanthin.

<sup>2</sup>AST: tissue concentrations of astaxanthin.

<sup>3</sup>MDA: malondialdehyde; GSH: glutathione; GST: Glutathione S-transferase; GPX: Glutathione peroxidase; GR: Glutathione reductase; SOD: Superoxidase dismutase.

\*, \*\*Positive or negative R and  $P < 0.05$  represents a positive or negative correlation between the concentration of AST and concentrations of MDA or GSH or activities of GST, GPX, GR, and SOD in a given tissue. \* $P < 0.05$ ; \*\*  $P < 0.01$ .

**Table S3.** Stepwise regression analysis of tissue redox biomarkers as dependent variables and dietary AST and DHA concentrations as independent variables in rainbow trout

| Dependent variables (Y) <sup>1</sup> | Significant independent variables (X) <sup>2</sup> | Equations                 |
|--------------------------------------|----------------------------------------------------|---------------------------|
| Plant meal-based diet                |                                                    |                           |
| <b>Muscle</b>                        | <b>Dietary AST &amp; DHA concentrations</b>        |                           |
| M <sup>3</sup> -MDA (μM/g protein)   | /                                                  | /                         |
| M-GSH (μM/mg protein)                | /                                                  | /                         |
| M-GST (mU/mg protein)                | X <sub>0</sub> : D-DHA (mg/g diet)                 | Y=0.55+0.25X <sub>0</sub> |
| M-GPX (mU/mg protein)                | /                                                  | /                         |
| M-GR (mU/mg protein)                 | /                                                  | /                         |
| M-SOD (mU/mg protein)                | X <sub>0</sub> : D-DHA (mg/g diet)                 | Y=10+8.7X <sub>0</sub>    |
| <b>Liver</b>                         | <b>Dietary AST &amp; DHA concentrations</b>        |                           |
| L-MDA (μM/g protein)                 | /                                                  | /                         |
| L-GSH (μM/mg protein)                | /                                                  | /                         |
| L-GST (mU/mg protein)                | /                                                  | /                         |
| L-GPX (mU/mg protein)                | /                                                  | /                         |
| L-GR (mU/mg protein)                 | /                                                  | /                         |
| L-SOD (mU/mg protein)                | X <sub>0</sub> : D-DHA (mg/g diet)                 | Y=79+35X <sub>0</sub>     |
| Fishmeal-based diet                  |                                                    |                           |
| <b>Muscle</b>                        | <b>Dietary AST &amp; DHA concentrations</b>        |                           |

|                                   |                                             |                     |
|-----------------------------------|---------------------------------------------|---------------------|
| M-MDA ( $\mu\text{M/g}$ protein)  | /                                           | /                   |
| M-GSH ( $\mu\text{M/mg}$ protein) | /                                           | /                   |
| M-GST (mU/mg protein)             | $X_0$ : D-DHA (mg/g diet)                   | $Y=0.71+ 0.76X_0$   |
| M-GPX (mU/mg protein)             | /                                           | /                   |
| M-GR (mU/mg protein)              | $X_0$ : D-DHA (mg/g diet)                   | $Y=0.149+ 0.045X_0$ |
| M-SOD (mU/mg protein)             | /                                           | /                   |
| <b>Liver</b>                      | <b>Dietary AST &amp; DHA concentrations</b> |                     |
| L-MDA ( $\mu\text{M/g}$ protein)  | /                                           | /                   |
| L-GSH ( $\mu\text{M/mg}$ protein) | /                                           | /                   |
| L-GST (mU/mg protein)             | /                                           | /                   |
| L-GPX (mU/mg protein)             | $X_0$ : D-DHA (mg/g diet)                   | $Y=4.4+ 5.5X_0$     |
| L-GR (mU/mg protein)              | /                                           | /                   |
| L-SOD (mU/mg protein)             | /                                           | /                   |

---

<sup>1</sup>Dependent variables (X, tissue concentrations or activities): MDA: malondialdehyde, GSH: glutathione, GST: glutathione S-transferase, GPX: glutathione peroxidase, GR: glutathione reductase, SOD: superoxide dismutase.

<sup>2</sup>Independent variables (Y, dietary concentrations): AST, astaxanthin; DHA, docosahexaenoic acid (refer to reference 15).

<sup>3</sup>D: diets; L: liver; and M: muscle.

**Table S4.** Stepwise regression analysis of tissue redox biomarkers as dependent variables and tissue AST and DHA concentrations and antioxidant enzyme gene mRNA levels as independent variables in rainbow trout

| Dependent variables (Y) <sup>1</sup> | Significant independent variables (X) <sup>2</sup>                                            | Equations                                      |
|--------------------------------------|-----------------------------------------------------------------------------------------------|------------------------------------------------|
| Plant meal-based diet                |                                                                                               |                                                |
| <b>Muscle</b>                        | <b>Tissue AST &amp; DHA concentrations and gene expression</b>                                |                                                |
| M <sup>3</sup> -MDA (μM/g protein)   | X <sub>0</sub> : L-GR (relative mRNA level)                                                   | Y=2.1-0.008X <sub>0</sub>                      |
| M-GSH (μM/mg protein)                | /                                                                                             | /                                              |
| M-GST (mU/mg protein)                | X <sub>0</sub> : L-CAT (relative mRNA level)                                                  | Y=0.078+0.005X <sub>0</sub>                    |
| M-GPX (mU/mg protein)                | /                                                                                             | /                                              |
| M-GR (mU/mg protein)                 | X <sub>0</sub> : L-CAT (relative mRNA level)                                                  | Y=0.01+ 0.002X <sub>0</sub>                    |
| M-SOD (mU/mg protein)                | X <sub>0</sub> : L-CAT (relative mRNA level)                                                  | Y=-4.7+0.18X <sub>0</sub>                      |
| <b>Liver</b>                         | <b>Tissue AST &amp; DHA concentrations and gene expression</b>                                |                                                |
| L-MDA (μM/g protein)                 | X <sub>1</sub> : L-GST (relative mRNA level)<br>X <sub>2</sub> : L-SOD1 (relative mRNA level) | Y=2.5+0.011X <sub>1</sub> -0.012X <sub>2</sub> |
| L-GSH (μM/mg protein)                | X <sub>0</sub> : L-GR (relative mRNA level)                                                   | Y=53+0.19X <sub>0</sub>                        |
| L-GST (mU/mg protein)                | X <sub>0</sub> : L-SOD2 (relative mRNA level)                                                 | Y=-1.6+0.051X <sub>0</sub>                     |
| L-GPX (mU/mg protein)                | X <sub>0</sub> : L-GPX1b2 (relative mRNA level)                                               | Y=21+0.06X <sub>0</sub>                        |
| L-GR (mU/mg protein)                 | X <sub>0</sub> : L-GST (relative mRNA level)                                                  | Y=1.2+0.006X <sub>0</sub>                      |
| L-SOD (mU/mg protein)                | X <sub>0</sub> : L-DHA (mg/g tissue)                                                          | Y=17+401X <sub>0</sub>                         |
| Fishmeal-based diet                  |                                                                                               |                                                |

| <b>Muscle</b>                     | <b>Tissue AST &amp; DHA concentrations and gene expression</b>                   |                           |
|-----------------------------------|----------------------------------------------------------------------------------|---------------------------|
| M-MDA ( $\mu\text{M/g}$ protein)  | /                                                                                | /                         |
| M-GSH ( $\mu\text{M/mg}$ protein) | $X_0$ : L-GPX1a (relative mRNA level)                                            | $Y=210-0.67X_0$           |
| M-GST (mU/mg protein)             | $X_1$ : L-GPX1a (relative mRNA level)<br>$X_2$ : L- GPX1b1 (relative mRNA level) | $Y=1.1-0.004X_1+0.004X_2$ |
| M-GPX (mU/mg protein)             | /                                                                                | /                         |
| M-GR (mU/mg protein)              | $X_0$ : L-GPX1a (relative mRNA level)                                            | $Y=1.3-0.001X_0$          |
| M-SOD (mU/mg protein)             | $X_0$ : L-SOD2 (relative mRNA level)                                             | $Y=52-0.221X_0$           |
| <b>Liver</b>                      | <b>Tissue AST &amp; DHA and gene expression</b>                                  |                           |
| L-MDA ( $\mu\text{M/g}$ protein)  | /                                                                                | /                         |
| L-GSH ( $\mu\text{M/mg}$ protein) | $X_0$ : L-AST ( $\mu\text{g/g}$ tissue)                                          | $Y=71+64X_0$              |
| L-GST (mU/mg protein)             | $X_1$ : L-SOD1 (relative mRNA level)<br>$X_2$ : L- GR (relative mRNA level)      | $Y=14-0.095X_1+0.016X_2$  |
| L-GPX (mU/mg protein)             | $X_0$ : L-GPX1a (relative mRNA level)                                            | $Y=29-0.13X_0$            |
| L-GR (mU/mg protein)              | $X_1$ : L-DHA (mg/g tissue)<br>$X_2$ : L-SOD1 (relative mRNA level)              | $Y=3.7+1.4X_1-0.032X_2$   |
| L-SOD (mU/mg protein)             | $X_0$ : L-CAT (relative mRNA level)                                              | $Y=-73+1.2X_0$            |

<sup>1</sup>Dependent variables (X, tissue concentrations or activities): MDA: malondialdehyde, GSH: glutathione, GST: glutathione S-transferase, GPX: glutathione peroxidase, GR: glutathione reductase, SOD: superoxide dismutase.

<sup>2</sup>Independent variables (Y): tissue concentrations of AST (astaxanthin) and DHA (docosahexaenoic acid, refer to reference 15) and mRNA levels of 8 antioxidant enzyme genes including catalase (CAT) gene.

<sup>3</sup>L: liver, M: muscle.
